# Supplementary material
Source: MDPI journal article supplement (https://www.mdpi.com/1999-4907/13/12/2001)
Supplement: s1 [file s1]

## Supplementary Materials

**Table S1.** Descriptive Statistics and randomization checks.

| Mesures                    | Lawn<br>M(SD) | Plaza<br>M(SD) | Greened<br>Street<br>M(SD) | Forest<br>M(SD) | Waterside<br>M(SD) | F    | <i>p</i> |
|----------------------------|---------------|----------------|----------------------------|-----------------|--------------------|------|----------|
| Arousal (baseline)         | 3.92 (1.01)   | 4.34 (0.82)    | 3.71 (1.06)                | 4.29 (1.21)     | 4.26 (0.9)         | 1.85 | 0.122    |
| Valence (baseline)         | 6.15 (0.9)    | 6.46 (1.27)    | 6.08 (1.03)                | 6.14 (1)        | 6.08 (0.72)        | 0.61 | 0.651    |
| Chronic Attention Fatigue  | 4.12 (1.12)   | 3.56 (1.32)    | 3.84 (1.54)                | 3.84 (1.37)     | 3.84 (1.54)        | 0.50 | 0.732    |
| Precieved Physical Health  | 4.08 (1.52)   | 4.96 (1.33)    | 4.48 (1.53)                | 5 (1.11)        | 4.56 (1.04)        | 2.04 | 0.092    |
| Depressive Symptom (PHQ-9) | 8.64 (4.86)   | 7.28 (4.76)    | 8.28 (5.37)                | 6.88 (4.52)     | 7.44 (5.18)        | 0.54 | 0.703    |
| Stress Symptom (PSS-10)    | 14.28 (4.97)  | 12.84 (5.39)   | 13.96 (5.57)               | 13.16 (5.16)    | 13.48 (4.1)        | 0.33 | 0.856    |

**Table S2.** Descriptive Statistics of the Outcome Variables.

| Group         | Session     | Valence M(SD) | Arousal M(SD) | BDS M(SD)    |
|---------------|-------------|---------------|---------------|--------------|
| Grass (N=25)  | T0 Baseline | 6.15 (0.9)    | 3.92 (1.01)   |              |
|               | T1 Stressor | 5.01 (1.45)   | 5.76 (1.32)   | 8.12 (3.45)  |
|               | T2 Recover  | 5.68 (1.15)   | 3.9 (1.31)    | 9.64 (3.14)  |
| Plaza (N=25)  | T0 Baseline | 6.46 (1.27)   | 4.34 (0.82)   |              |
|               | T1 Stressor | 4.8 (1.21)    | 6.4 (0.86)    | 9.28 (2.54)  |
|               | T2 Recover  | 5.95 (1.47)   | 3.79 (0.88)   | 10.48 (2.08) |
| Street (N=25) | T0 Baseline | 6.08 (1.03)   | 3.71 (1.06)   |              |
|               | T1 Stressor | 5.4 (1.31)    | 6.13 (0.88)   | 9.28 (2.76)  |
|               | T2 Recover  | 5.02 (0.91)   | 3.96 (1.25)   | 9.64 (2.54)  |
| Forest (N=25) | T0 Baseline | 6.14 (1)      | 4.29 (1.21)   |              |
|               | T1 Stressor | 4.78 (0.81)   | 6.18 (1.35)   | 8.96 (2.57)  |
|               | T2 Recover  | 5.98 (1.26)   | 4.21 (1.24)   | 10.36 (2.21) |
| Lake (N=25)   | T0 Baseline | 6.08 (0.72)   | 4.26 (0.9)    |              |
|               | T1 Stressor | 4.67 (0.87)   | 6.24 (1.11)   | 8.68 (3.23)  |
|               | T2 Recover  | 6.08 (1.03)   | 4.12 (1.28)   | 10.56 (2.58) |

Notes. T0 = baseline; T1 = pre-video; T2 = post-video. .

**Table S3.** Results of regression models testing the interaction between environmental treatment and stress symptoms (PSS-10 sum score) on BDS score.

| BDS (Post-Video)                | Step1  |      |          | Step2 |      |          | Step3 |       |          | Step4  |       |          |
|---------------------------------|--------|------|----------|-------|------|----------|-------|-------|----------|--------|-------|----------|
|                                 | B      | SE   | <i>p</i> | B     | SE   | <i>p</i> | B     | SE    | <i>p</i> | B      | SE    | <i>p</i> |
| Constant                        | 10.136 | .140 | 0.000    | 9.352 | .307 | 0.000    | 9.326 | 0.304 | 0.000    | 9.307  | 0.305 | 0.000    |
| BDS pre-video (centered)        | 0.683  | .048 | 0.000    | 0.693 | .048 | 0.000    | 0.705 | 0.048 | 0.000    | 0.693  | 0.049 | 0.000    |
| Treatment (street as reference) |        |      |          |       |      |          |       |       |          |        |       |          |
| Grass                           |        |      |          | 0.804 | .437 | 0.068    | 0.802 | 0.432 | 0.066    | 0.877  | 0.435 | 0.046    |
| Plaza                           |        |      |          | 0.840 | .433 | 0.055    | 0.896 | 0.430 | 0.039    | 0.943  | 0.432 | 0.031    |
| Forest                          |        |      |          | 0.942 | .433 | 0.032    | 0.986 | 0.430 | 0.024    | 1.005  | 0.431 | 0.022    |
| Lake                            |        |      |          | 1.336 | .434 | 0.003    | 1.367 | 0.430 | 0.002    | 1.381  | 0.431 | 0.002    |
| PSS score (centered)            |        |      |          |       |      |          | 0.050 | 0.028 | 0.071    | 0.107  | 0.056 | 0.056    |
| Treatment x PSS score           |        |      |          |       |      |          |       |       |          |        |       |          |
| Grass x PSS score               |        |      |          |       |      |          |       |       |          | -0.147 | 0.085 | 0.086    |
| Plaza x PSS score               |        |      |          |       |      |          |       |       |          | -0.025 | 0.080 | 0.754    |
| Forest x PSS score              |        |      |          |       |      |          |       |       |          | -0.059 | 0.082 | 0.472    |
| Lake x PSS score                |        |      |          |       |      |          |       |       |          | -0.091 | 0.094 | 0.334    |
| R <sup>2</sup>                  | 0.620  |      |          | 0.650 |      |          | 0.659 |       |          | 0.670  |       |          |
| ΔR <sup>2</sup>                 |        |      |          | 0.030 |      | 0.045    | 0.010 |       | 0.071    | 0.010  |       | 0.472    |

**Table S4.** Results of regression models testing the interaction between environmental treatment and depressive symptoms (PHQ-9 sum score) on BDS score.

| BDS (Post-Video)                | Step1  |       |          | Step2 |       |          | Step3 |       |          | Step4  |       |          |
|---------------------------------|--------|-------|----------|-------|-------|----------|-------|-------|----------|--------|-------|----------|
|                                 | B      | SE    | <i>p</i> | B     | SE    | <i>p</i> | B     | SE    | <i>p</i> | B      | SE    | <i>p</i> |
| Constant                        | 10.136 | 0.140 | 0.000    | 9.352 | 0.307 | 0.000    | 9.339 | 0.308 | .000     | 9.332  | 0.306 | 0.000    |
| BDS pre-video (centered)        | 0.683  | 0.048 | 0.000    | 0.693 | 0.048 | 0.000    | 0.697 | 0.048 | .000     | 0.712  | 0.048 | 0.000    |
| Treatment (street as reference) |        |       |          |       |       |          |       |       |          |        |       |          |
| Grass                           |        |       |          | 0.804 | 0.437 | 0.068    | 0.802 | 0.438 | .070     | 0.942  | 0.438 | 0.033    |
| Plaza                           |        |       |          | 0.840 | 0.433 | 0.055    | 0.859 | 0.435 | .051     | 0.893  | 0.431 | 0.040    |
| Forest                          |        |       |          | 0.942 | 0.433 | 0.032    | 0.969 | 0.436 | .028     | 1.041  | 0.434 | 0.018    |
| Lake                            |        |       |          | 1.336 | 0.434 | 0.003    | 1.354 | 0.436 | .002     | 1.361  | 0.431 | 0.002    |
| PHQ score (centered)            |        |       |          |       |       |          | 0.019 | 0.029 | .509     | 0.020  | 0.058 | 0.735    |
| Treatment x PHQ score           |        |       |          |       |       |          |       |       |          |        |       |          |
| Grass x PHQ score               |        |       |          |       |       |          |       |       |          | -0.132 | 0.086 | 0.128    |
| Plaza x PHQ score               |        |       |          |       |       |          |       |       |          | 0.080  | 0.087 | 0.363    |
| Forest x PHQ score              |        |       |          |       |       |          |       |       |          | 0.080  | 0.089 | 0.372    |
| Lake x PHQ score                |        |       |          |       |       |          |       |       |          | -0.010 | 0.083 | 0.901    |
| R <sup>2</sup>                  | 0.620  |       |          | 0.650 |       |          | 0.651 |       |          | 0.672  |       |          |
| ΔR <sup>2</sup>                 |        |       |          | 0.030 |       | 0.045    | 0.001 |       | 0.509    | 0.020  |       | 0.139    |

**Table S5.** Results of regression models testing the interaction between environmental treatment and stress symptoms (PSS-10 sum score) on valence.

| Valence (Post-Video)            | Step1 |       |          | Step2 |       |          | Step3  |       |          | Step4  |       |          |
|---------------------------------|-------|-------|----------|-------|-------|----------|--------|-------|----------|--------|-------|----------|
|                                 | B     | SE    | <i>p</i> | B     | SE    | <i>p</i> | B      | SE    | <i>p</i> | B      | SE    | <i>p</i> |
| Constant                        | 5.746 | 0.100 | 0.000    | 4.774 | 0.204 | 0.000    | 4.786  | 0.205 | 0.000    | 4.789  | 0.204 | 0.000    |
| Valence pre-video (centered)    | 0.445 | 0.085 | 0.000    | 0.543 | 0.079 | 0.000    | 0.532  | 0.080 | 0.000    | 0.532  | 0.080 | 0.000    |
| Treatment (street as reference) |       |       |          |       |       |          |        |       |          |        |       |          |
| Grass                           |       |       |          | 0.863 | 0.286 | 0.003    | 0.865  | 0.286 | 0.003    | 0.857  | 0.287 | 0.003    |
| Plaza                           |       |       |          | 1.252 | 0.288 | 0.000    | 1.225  | 0.289 | 0.000    | 1.210  | 0.289 | 0.000    |
| Forest                          |       |       |          | 1.287 | 0.288 | 0.000    | 1.266  | 0.289 | 0.000    | 1.288  | 0.289 | 0.000    |
| Lake                            |       |       |          | 1.458 | 0.290 | 0.000    | 1.441  | 0.290 | 0.000    | 1.433  | 0.290 | 0.000    |
| PSS score (centered)            |       |       |          |       |       |          | -0.018 | 0.018 | 0.327    | -0.026 | 0.037 | 0.488    |
| Treatment x PSS score           |       |       |          |       |       |          |        |       |          |        |       |          |
| Grass x PSS score               |       |       |          |       |       |          |        |       |          | 0.014  | 0.055 | 0.798    |
| Plaza x PSS score               |       |       |          |       |       |          |        |       |          | -0.009 | 0.053 | 0.863    |
| Forest x PSS score              |       |       |          |       |       |          |        |       |          | 0.072  | 0.054 | 0.187    |
| Lake x PSS score                |       |       |          |       |       |          |        |       |          | -0.061 | 0.062 | 0.329    |
| R <sup>2</sup>                  | 0.180 |       |          | 0.355 |       |          | 0.361  |       |          | 0.386  |       |          |
| ΔR <sup>2</sup>                 |       |       |          | 0.175 |       | 0.000    | 0.005  |       | 0.327    | 0.026  |       | 0.318    |

**Table S6.** Results of regression models testing the interaction between environmental treatment and depressive symptoms (PHQ-9 sum score) on valence.

| Valence (Post-Video)            | Step1 |       |          | Step2 |       |          | Step3  |       |          | Step4  |       |          |
|---------------------------------|-------|-------|----------|-------|-------|----------|--------|-------|----------|--------|-------|----------|
|                                 | B     | SE    | <i>p</i> | B     | SE    | <i>p</i> | B      | SE    | <i>p</i> | B      | SE    | <i>p</i> |
| Constant                        | 5.746 | 0.100 | 0.000    | 4.774 | 0.204 | 0.000    | 4.808  | 0.202 | 0.000    | 4.811  | 0.203 | 0.000    |
| Valence pre-video (centered)    | 0.445 | 0.085 | 0.000    | 0.543 | 0.079 | 0.000    | 0.517  | 0.079 | 0.000    | 0.488  | 0.080 | 0.000    |
| Treatment (street as reference) |       |       |          |       |       |          |        |       |          |        |       |          |
| Grass                           |       |       |          | 0.863 | 0.286 | 0.003    | 0.867  | 0.282 | 0.003    | 0.828  | 0.285 | 0.004    |
| Plaza                           |       |       |          | 1.252 | 0.288 | 0.000    | 1.198  | 0.285 | 0.000    | 1.161  | 0.286 | 0.000    |
| Forest                          |       |       |          | 1.287 | 0.288 | 0.000    | 1.218  | 0.286 | 0.000    | 1.234  | 0.287 | 0.000    |
| Lake                            |       |       |          | 1.458 | 0.290 | 0.000    | 1.407  | 0.287 | 0.000    | 1.390  | 0.288 | 0.000    |
| PHQ score (centered)            |       |       |          |       |       |          | -0.038 | 0.019 | 0.044    | -0.020 | 0.038 | 0.601    |
| Treatment x PHQ score           |       |       |          |       |       |          |        |       |          |        |       |          |
| Grass x PHQ score               |       |       |          |       |       |          |        |       |          | 0.022  | 0.056 | 0.694    |
| Plaza x PHQ score               |       |       |          |       |       |          |        |       |          | -0.089 | 0.057 | 0.119    |
| Forest x PHQ score              |       |       |          |       |       |          |        |       |          | 0.011  | 0.059 | 0.855    |
| Lake x PHQ score                |       |       |          |       |       |          |        |       |          | -0.039 | 0.054 | 0.470    |
| R <sup>2</sup>                  | 0.180 |       |          | 0.355 |       |          | 0.377  |       |          | 0.401  |       |          |
| ΔR <sup>2</sup>                 |       |       |          | 0.175 |       | 0.000    | 0.022  |       | 0.044    | 0.024  |       | 0.341    |
